# Supplementary material for: Mechanoluminescence by Direct Laser Writing: A Seconds-Scale Fabrication Strategy
Source: Research Square preprint supplement (doi:10.21203/rs.3.rs-8106340/v1), 2026-01-08
Supplement: Supplementary file 1 [file 26aadcdf0467a4caa7550684.docx]

Supplementary Information

Mechanoluminescence by Direct Laser Writing: A Seconds-Scale Fabrication Strategy

Wei Tao1, Liang Shen1, Yufeng Xue1, Shicheng Yuan1, Tingxuan Chen1, Qinhua Hu1*, Wenjie Wu2*, Xiaokang Chen2, Enjie Wang1, Ye Liu3, Thomas Maurer4,5, and Dengfeng Peng6,*

1 DGUT-CNAM Institute, Dongguan University of Technology, Dongguan, China

2 Institute of Emergent Elastomers, School of Materials Science and Engineering, South China University of Technology, Guangzhou, China

3 School of Electronic Engineering and Intelligentization, Dongguan University of Technology, Dongguan, China

4 Univ. Lille, Centrale Lille, Cité Scientifique, Lille, France

5 Laboratory Light, Nanomaterials and Nanotechnologies—L2n, University of Technology of Troyes and CNRS UMR 7076, Troyes, France

6 Key Laboratory of Optoelectronic Devices and Systems of Ministry of Education and Guangdong Province College of Physics and Optoelectronic Engineering, Shenzhen University, Shenzhen, China

*Correspondence: Qinhua Hu, Wenjie Wu, Dengfeng Peng

**Contents**

Supplementary Fig. 1:Optical images illustrating the LIL fabrication process

Supplementary Fig. 2:Demonstration of reduced powder generation and ML emission of ZCM@LIL with B2O3 addition.

Supplementary Fig. 3: SEM characterization of CaZnOS:Mn@LIL

Supplementary Fig. 4: EDS characterization of ZCM@LIL

Supplementary Fig. 5: XRD patterns of ZnS:Mn, CaZnOS:Mn and ZnS/CaZnOS:Mn.

Supplementary Fig. 6: PL excitation, emission and decay of ZnS:Mn, CaZnOS:Mn and ZnS/CaZnOS:Mn.

Supplementary Note 1: Details of FEM simulation

Supplementary Note 2: Deep learning framework

Supplementary Movie 1: Fabrication and ML performance of laser-induced luminophores

Supplementary Movie 2: ML performance of ZCM@LIL-ER cylindrical blends

Supplementary Movie 3: ML performance of ZCM@LIL-ER cubic blends

Supplementary Movie 4: Demonstration of the deep learning-driven control system


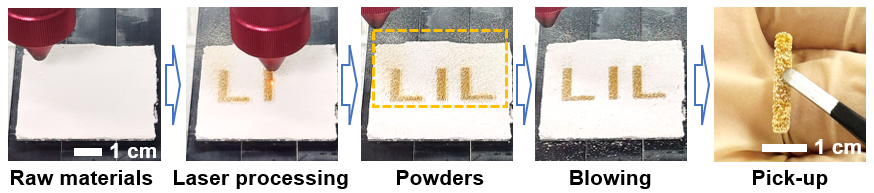


Supplementary Fig. 1.Optical images illustrating the LIL fabrication process: raw precursor film, laser writing to form “LIL” patterns, powder removal via air blowing, and pick-up of the crystallized ZnS/CaZnOS:Mn LIL. The rightmost image reveals the porous and rugged morphology of the LIL, visible to the naked eye. Scale bars: 1 cm.


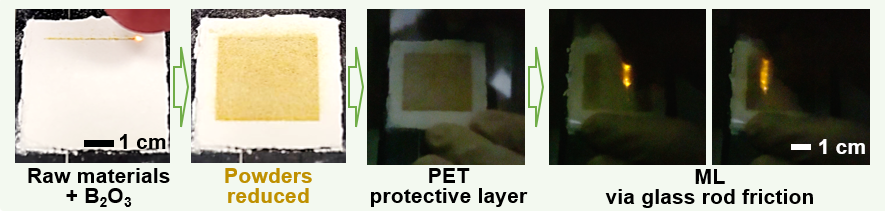


Supplementary Fig. 2.Demonstration of reduced powder generation and ML emission of ZCM@LIL with B2O3 addition. The emission is triggered by glass rod friction against a PET protective layer.

**
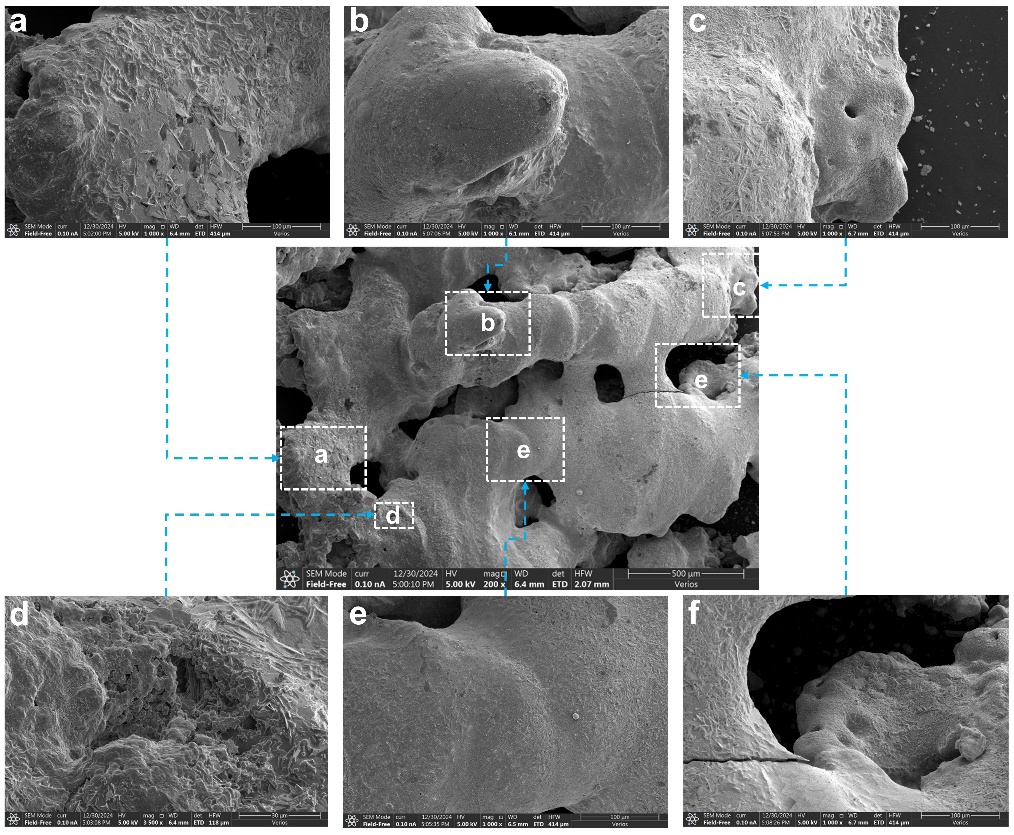
**

Supplementary Fig. 3.SEM characterization of CaZnOS:Mn@LIL at laser power of 20W.

**
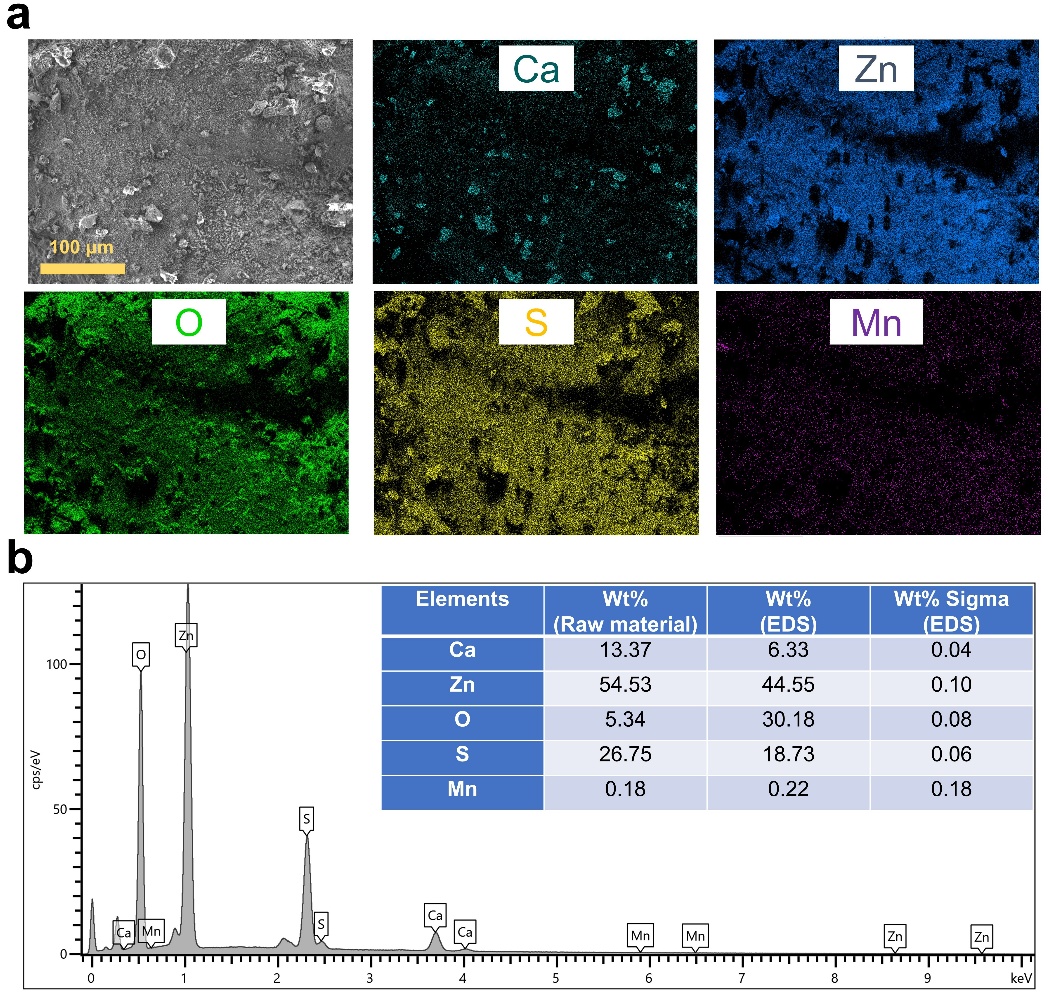
**

Supplementary Fig. 4.EDS characterization of CaZnOS:Mn@LIL at laser power of 20W.


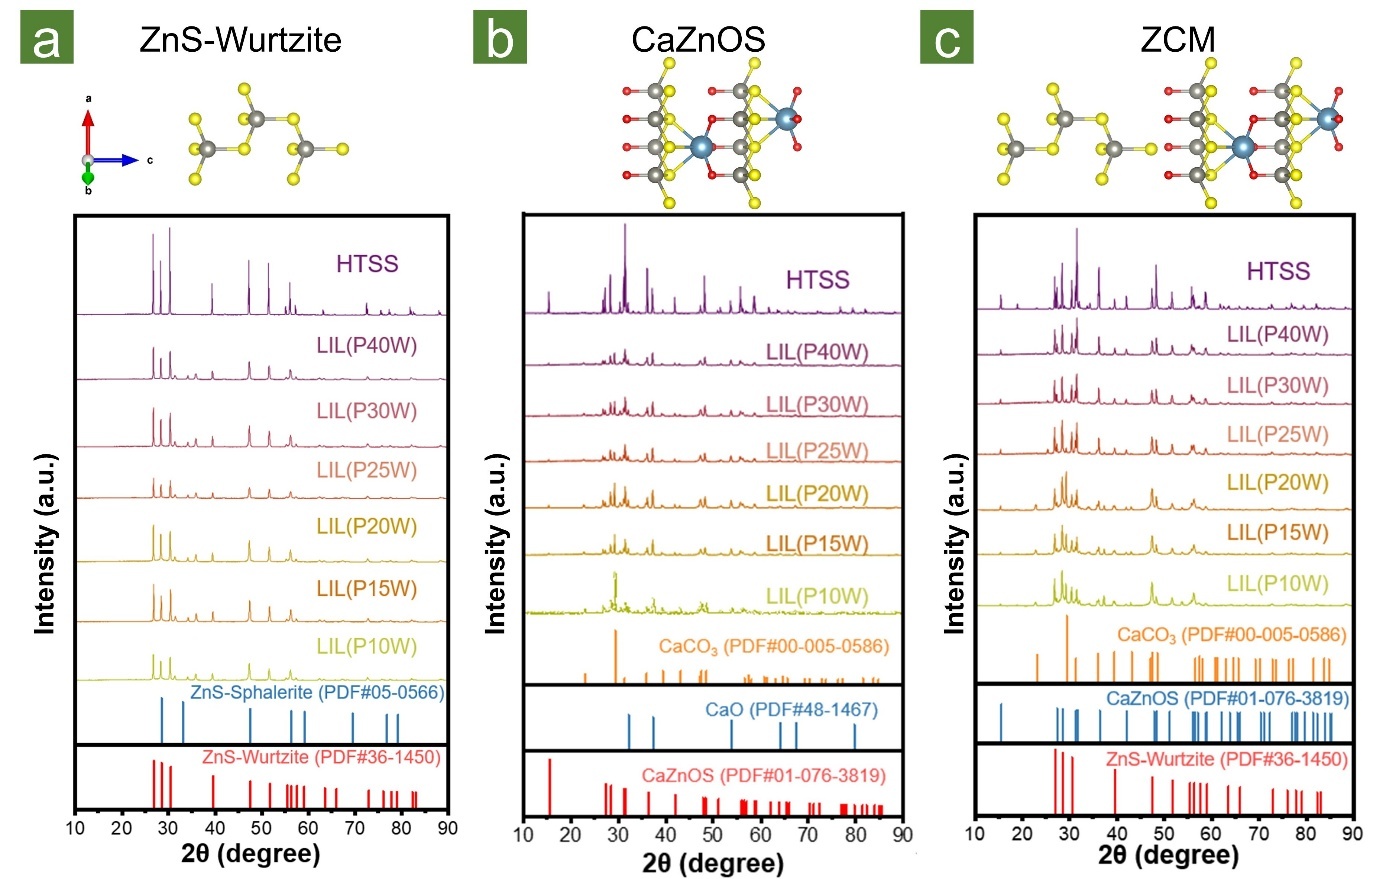


Supplementary Fig. 5**.** XRD patterns of ZnS:Mn, CaZnOS:Mn and ZnS/CaZnOS:Mn prepared by HTSS and LTP at different powers.


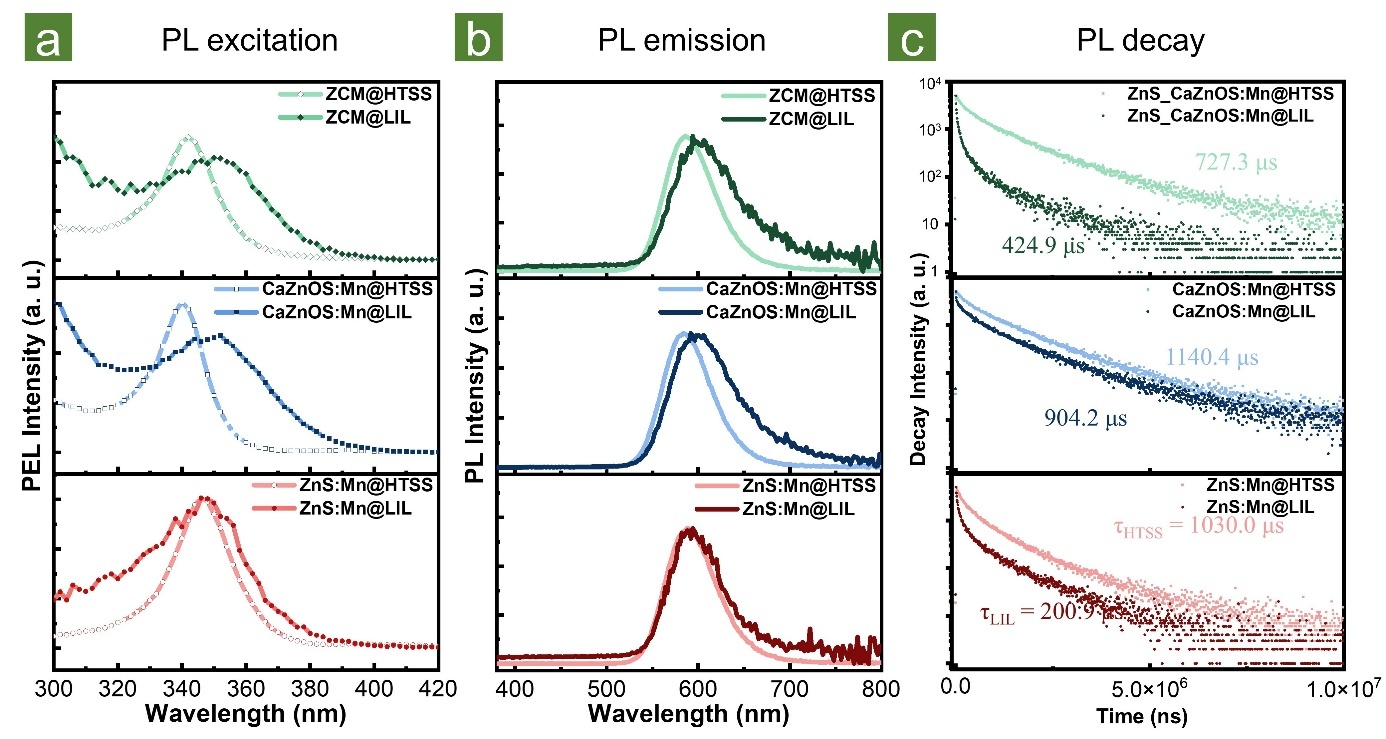


Supplementary Fig. 6.PL excitation, emission, and decay curves of ZnS:Mn, CaZnOS:Mn and ZnS/CaZnOS:Mn. The decay curves are in logarithmic scale.

**Supplementary Note 1. FEM simulation details**

In the simulation framework, the laser heat flux () is delineated by a composite Gaussian distribution, expressed as:

where denotes the distance between the laser beam and the focal point, and  represents the laser spot radius. The simulation model neglects heat convection, while heat conduction is coupled via the following equation:

where is the material density,  signifies the specific heat capacity at constant pressure, is the velocity vector, denotes the thermal conductivity, and is the heat source tern. In addition, thermal radiation emitted from the material surface to the environment is accounted for by:

where is the heat flux vector,  is unit normal vector to the surface, is emissivity of the surface, is the Stefan-Boltzmann constant, and stands for the ambient temperature. Finally, thermal strain ()  is proportional to the temperature variation and the thermal expansion coefficient. It is regulated by dissipative heat () and entropy () as follows:

**Supplementary Note 2. Deep learning framework**

This study proposes a five-level progressive deep learning system architecture, consisting of a preprocessing layer, data augmentation layer, model architecture layer, optimization strategy layer, and performance evaluation layer. Through a closed-loop process of feature enhancement, data augmentation, CNN modeling, optimization parameter tuning, visualization display, it achieves efficient classification of "A, D, S, W" four types of ML alphabet images. Aiming at the recognition challenges of incomplete images, this architecture conducts full-link analysis from data processing, model construction to result optimization, demonstrating advantages in robustness and accuracy.

In the aspect of ML image preprocessing, multiple operations are employed to strengthen alphabet features and improve image quality. First, a Laplacian second-order differential operator is used for convolution with a sharpening factor of 2.0, enhancing the gradient amplitude of alphabet edges and effectively highlighting contour clarity. Second, contrast stretching is performed via a linear transformation function (where *x* represents the grayscale value of the original image pixel, *min* and *max* are the minimum and maximum grayscale values of the original image, and *contrast_factor=1.5* controls the contrast enhancement degree), expanding the distribution range of grayscale values, increasing the entropy of pixel grayscale distribution, and thus enlarging the variance between alphabets and the background in the class space to enhance image recognizability. For brightness unevenness, a brightness equalization strategy is adopted: when the mean_brightness of the image is less than 128, linear mapping is performed (where *x* is the original pixel value, *y* is the pixel value with enhanced brightness), and experiments based on classification evaluation metrics such as accuracy and precision show that this operation improves the recognition rate of alphabets under dark backgrounds. The Laplacian second-order differential operator enhances the grayscale difference on both sides of edges to strengthen the contrast of alphabet stroke boundaries, followed by the Sobel first-order differential operator to accurately extract contour shape features, providing precise edge positioning for image binarization. Finally, combining morphological topology methods, erosion and dilation techniques with a 3×3 structural element eliminates isolated noise and connect broken alphabet strokes, significantly closing alphabet gaps and improving contour integrity.

In data augmentation, this study constructs a self-built dataset containing four types of alphabets ("A, D, S, W") with 60 original samples (15 per class). Data augmentation is performed on preprocessed 224×224 binary grayscale images, expanding the sample size to 2,400, which are divided into training, validation, and test sets at a ratio of 7:1:2. The augmentation strategy employs two methods: (1) targeted occlusion, where alphabets are in white regions and the background is in black regions, using the same color as the background for occludes in shapes of circles, rectangles, triangles, and irregular figures, with five occlusion ratios (10%, 20%, 30%, 40%, 50%) for independent occlusion processing of each region, expanding a single image into 20 augmented samples; (2) adding salt-and-pepper noise, injecting black and white noise points randomly with a density of 0.02-0.1, combined with local pixel perturbations of different intensities, to simulate sudden errors such as image stains caused by signal interference in experiments. This strategy not only expands the dataset scale but also effectively improves the model's generalization ability by simulating partial occlusions and stain interferences in real-world scenarios. As illustrated in Supplementary Fig. 6, partial ML images of the four alphabets are presented, with four representative images demonstrating the "targeted occlusion" augmentation strategy.


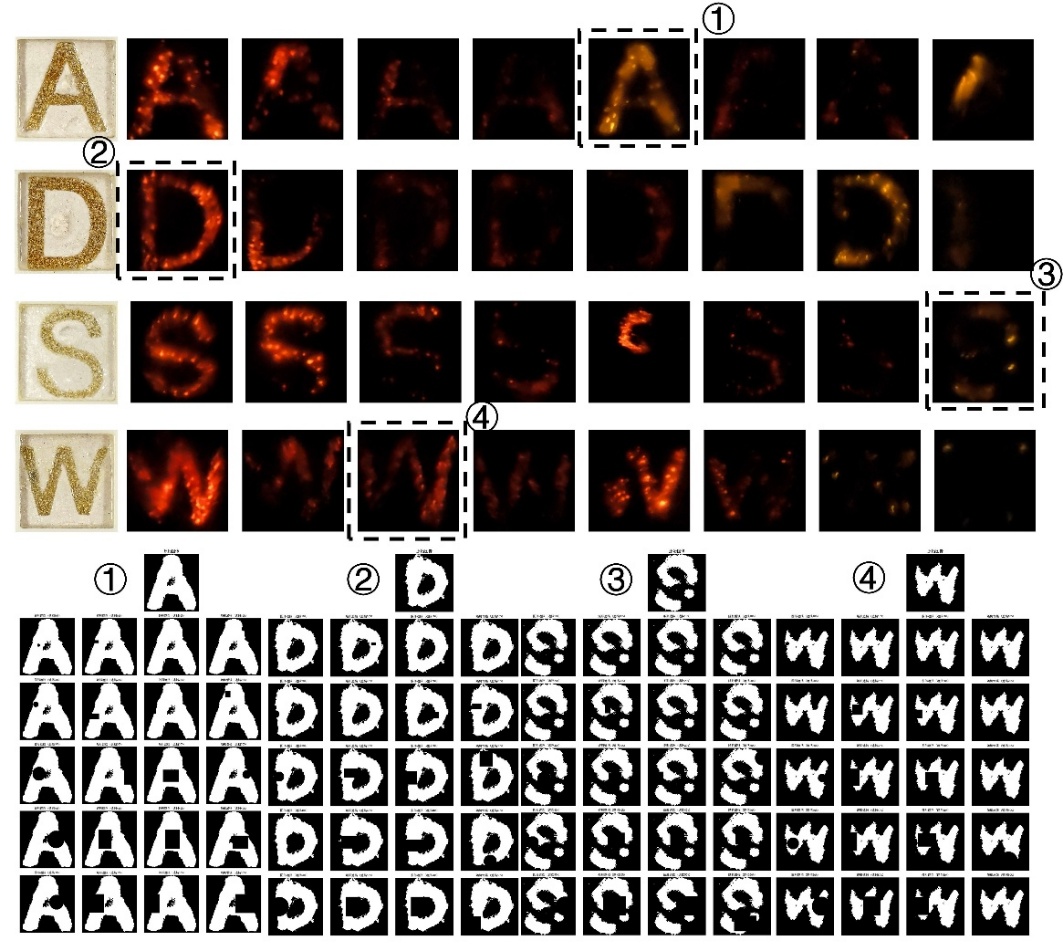


Supplementary Fig. 6.ML images and the targeted occlusion" augmentation strategy.

Model optimization is conducted from three dimensions: data, training, and architecture. In the data dimension, addressing sample class imbalance, the WeightedRandomSampler function is adopted (where *N* is the total number of samples in all classes, is the number of samples in the *i-th* class, and is the sample integrity score), dynamically assigning weights based on the reciprocal of the number of samples in each class and the data quality of each sample to increase the sampling probability of rare classes (samples with better integrity). In the training dimension, the ReduceLROnPlateau scheduler is used for adaptive learning rate adjustment: when the validation loss does not decrease for 3 consecutive epochs, the learning rate is reduced by 50%, effectively avoiding local optima, while the minimum learning rate (1e-5) prevents training stagnation due to excessive learning rate decay; an early stopping mechanism with a patience of 5 epochs avoids ineffective training when the validation set performance no longer improves, saving computational resources and preventing overfitting. In the model architecture dimension, ablation experiments verify the effectiveness of key components. Experiments show that the asymmetric activation characteristic of LeakyReLU significantly enhances the model's response to direction-sensitive features such as straight lines and acute angles of alphabets, especially for recognizing the triangular framework of "A" and the multi-peak structure of "W"; removing LeakyReLU leads to a decrease in the classification accuracy of "A" and "W". Removing the Dropout layer increases the validation set variance, a manifestation of overfitting, where the model performs excellently on the training set but fluctuates greatly on the validation set, causing significant differences in model parameters across different training batches and unstable prediction results. Through repeated optimizations, it is determined that the combination of three-level Dropout (0.5+0.5+0.4) and BatchNorm achieves the optimal model evaluation performance, proving the effectiveness of the implicit attention mechanism.

The detailed information of the corresponding CNN model architecture and operational configurations in this study is shown in the following tables.

Supplementary Table 1. CNN Model Architecture

| **Layer** | **Input** | **Output** | **Kernel Size** | **Channel Number** | **Activation Function** | **Configuration** |
| --- | --- | --- | --- | --- | --- | --- |
| **Convolutional Layer 1** | 224×224×1 | 224×224×32 | 3×3 | 32 | LeakyReLU(0.1) | BatchNorm2d |
| **Max Pooling Layer 1** | 224×224×32 | 112×112×32 | 2×2 |  |  | stride=2 |
| **Convolutional Layer 2** | 112×112×32 | 112×112×64 | 3×3 | 64 | LeakyReLU(0.1) | BatchNorm2d |
| **Max Pooling Layer 2** | 112×112×64 | 56×56×64 | 2×2 |  |  | stride=2 |
| **Convolutional Layer 3** | 56×56×64 | 56×56×128 | 3×3 | 128 | LeakyReLU(0.1) | BatchNorm2d |
| **Max Pooling Layer 3** | 56×56×128 | 28×28×128 | 2×2 |  |  | stride=2 |
| **Convolutional Layer 4** | 28×28×128 | 28×28×256 | 3×3 | 256 | LeakyReLU(0.1) | BatchNorm2d |
| **Adaptive Pooling Layer** | 28×28×256 | 7×7×256 |  |  |  | AdaptiveAvgPool2d (7,7) |
| **Fully Connected Layer 1** | 7×7×256 | 512 |  | 512 | LeakyReLU(0.1) | Dropout (0.5), BatchNorm1d |
| **Fully Connected Layer 2** | 512 | 256 |  | 256 | LeakyReLU(0.1) | Dropout (0.5), BatchNorm1d |
| **Output Layer** | 256 | 4 |  | 4 | Softmax |  |

Supplementary Table 2.Operational Configurations/Versions of the CNN Model

| **Type** | **Operational Configurations/Versions** |
| --- | --- |
| **CPU** | Intel i5-12600KF |
| **GPU** | NVIDIA GeForce RTX 3060Ti（16GB） |
| **RAM** | 32GB |
| **Windows** | Windows 10 |
| **torcch** | 2.4.1+cu121 |
| **torchaudio** | 2.4.1+cu121 |
| **torchvision** | 0.19.1+cu121 |
| **python** | 3.8.20 |
| **numpy** | 1.22.0 |
| **scikit-learn** | 1.3.2 |
| **matplotlib** | 3.7.5 |
